# Supplementary material
Source: publisher figshare collection journal article supplement (https://gsajournals.figshare.com/ndownloader/files/13173446)
Supplement: Supplementary file 1 [file 13173446]

## Supplemental Information

**Table S1: Dose response conditions**

| Toxin           | Class               | Doses Tested ( $\mu\text{M}$ ) | Mapping Concentration ( $\mu\text{M}$ ) | Diluent |
|-----------------|---------------------|--------------------------------|-----------------------------------------|---------|
| Cadmium         | Heavy Metal         | 100, 200, 300, 400             | 100                                     | Water   |
| Carmustine      | Chemotherapeutic    | 125, 250, 500, 1000            | 250                                     | DMSO    |
| Chlorothalonil  | Pesticide           | 125, 250, 500, 1000            | 250                                     | DMSO    |
| Chlorpyrifos    | Pesticide           | 0.25, 0.5, 1, 2                | 1                                       | DMSO    |
| Cisplatin       | Chemotherapeutic    | 125, 250, 500, 1000            | 250                                     | Water   |
| Copper          | Heavy Metal         | 625, 125, 250, 500             | 250                                     | Water   |
| Diquat          | Pesticide           | 250, 500, 1000, 2000           | 250                                     | Water   |
| Fluoxetine      | Neuropharmaceutical | 625, 125, 250, 500             | 250                                     | DMSO    |
| FUdR            | Chemotherapeutic    | 375, 50, 75, 100               | 50                                      | Water   |
| Irinotecan      | Chemotherapeutic    | 625, 125, 250, 500             | 125                                     | DMSO    |
| Mechlorethamine | Chemotherapeutic    | 200, 300, 400, 500             | 200                                     | DMSO    |
| Paraquat        | Pesticide           | 500, 1000, 2000, 4000          | 500                                     | Water   |
| Silver          | Heavy Metal         | 75, 150, 300, 500              | 150                                     | Water   |
| Topotecan       | Chemotherapeutic    | 50, 100, 200, 400              | 400                                     | Water   |
| Tunicamycin     | Chemotherapeutic    | 5, 10, 15, 20                  | 10                                      | DMSO    |
| Vincristine     | Chemotherapeutic    | 20, 40, 60, 80                 | 80                                      | Water   |

**Table S2: Principal components that explain 90% of phenotypic variation per toxin**

| <b>Toxin</b>    | <b>Number of Principal Components</b> | <b>Cumulative Variance Explained</b> |
|-----------------|---------------------------------------|--------------------------------------|
| Cadmium         | 6                                     | 90.93%                               |
| Carmustine      | 6                                     | 90.26%                               |
| Chlorothalonil  | 6                                     | 91.98%                               |
| Chlorpyrifos    | 7                                     | 91.60%                               |
| Cisplatin       | 6                                     | 90.75%                               |
| Copper          | 8                                     | 91.64%                               |
| Diquat          | 6                                     | 90.95%                               |
| Fluoxetine      | 7                                     | 90.09%                               |
| FUdR            | 7                                     | 91.47%                               |
| Irinotecan      | 5                                     | 92.78%                               |
| Mechlorethamine | 7                                     | 91.93%                               |
| Paraquat        | 5                                     | 90.50%                               |
| Silver          | 5                                     | 92.41%                               |
| Topotecan       | 5                                     | 90.39%                               |
| Tunicamycin     | 5                                     | 93.28%                               |
| Vincristine     | 6                                     | 92.60%                               |

**Table S3: Power calculations**

| <b>Number of replicates</b> | <b>Phenotypic variance explained (%) detectable<br/>with 80% power</b> |
|-----------------------------|------------------------------------------------------------------------|
| 23                          | 38                                                                     |
| 46                          | 21.9                                                                   |
| 69                          | 15.3                                                                   |
| 92                          | 11.7                                                                   |
| 115                         | 9.5                                                                    |
| 138                         | 8                                                                      |

**Table S4: List of PCs mapped to each hotspot with NIL-assay tested toxins in bold**

| IV Left               |            |              | IV Right              |            |              | V                     |            |              |
|-----------------------|------------|--------------|-----------------------|------------|--------------|-----------------------|------------|--------------|
| Toxin                 | Trait      | %VE          | Toxin                 | Trait      | %VE          | Toxin                 | Trait      | %VE          |
| <b>Carmustine</b>     | <b>PC6</b> | <b>5.60</b>  | <b>Chlorothalonil</b> | <b>PC3</b> | <b>10.88</b> | <b>Carmustine</b>     | <b>PC1</b> | <b>7.00</b>  |
| <b>Chlorothalonil</b> | <b>PC2</b> | <b>4.31</b>  | Chlorpyrifos          | PC2        | 7.74         | <b>Chlorothalonil</b> | <b>PC1</b> | <b>15.35</b> |
| <b>Chlorothalonil</b> | <b>PC3</b> | <b>12.90</b> | Cisplatin             | PC3        | 2.68         | <b>Cisplatin</b>      | <b>PC1</b> | <b>10.25</b> |
| Chlorpyrifos          | PC1        | 6.34         | <b>Fluoxetine</b>     | <b>PC1</b> | <b>10.73</b> | <b>Cisplatin</b>      | <b>PC4</b> | <b>7.18</b>  |
| <b>Cisplatin</b>      | <b>PC1</b> | <b>6.05</b>  | <b>Fluoxetine</b>     | <b>PC5</b> | <b>7.92</b>  | Irinotecan            | PC2        | 6.78         |
| <b>Cisplatin</b>      | <b>PC3</b> | <b>4.78</b>  | FUdR                  | PC3        | 5.54         | Irinotecan            | PC5        | 6.43         |
| Copper                | PC2        | 4.85         | <b>Irinotecan</b>     | <b>PC2</b> | <b>5.49</b>  | Mechlorethamine       | PC2        | 8.67         |
| Copper                | PC6        | 5.86         | Vincristine           | PC6        | 6.75         | <b>Paraquat</b>       | <b>PC1</b> | <b>9.98</b>  |
| Fluoxetine            | PC1        | 6.65         |                       |            |              | <b>Silver</b>         | <b>PC1</b> | <b>17.81</b> |
| FUdR                  | PC3        | 5.54         |                       |            |              |                       |            |              |
| <b>Silver</b>         | <b>PC3</b> | <b>9.76</b>  |                       |            |              |                       |            |              |
| <b>Silver</b>         | <b>PC4</b> | <b>9.28</b>  |                       |            |              |                       |            |              |
| <b>Silver</b>         | <b>PC5</b> | <b>11.70</b> |                       |            |              |                       |            |              |
| Topotecan             | PC2        | 9.70         |                       |            |              |                       |            |              |
| <b>Tunicamycin</b>    | <b>PC1</b> | <b>15.90</b> |                       |            |              |                       |            |              |
| <b>Tunicamycin</b>    | <b>PC3</b> | <b>6.70</b>  |                       |            |              |                       |            |              |
| Vincristine           | PC5        | 6.47         |                       |            |              |                       |            |              |
| Vincristine           | PC6        | 6.75         |                       |            |              |                       |            |              |

## ***Reagents used to generate NILs and CSSs***

### Chromosome IVL NILs:

**ECA229[*eanIR149*(IV:3,684,741-9,045,991, N2>CB4856)]**

starting RIAL: QX275

**ECA231[*eanIR151*(IV:4,475,146-9,334,865, CB4856>N2)]**

starting RIAL: QX591

Left indel primers (IV: 5,110,734)

oECA781: GAGCACTTTGGCGACTTTTCG

oECA782: TCCGGGCAAATTAGTGTGGC

Right indel primers (IV: 8,212,089)

oECA857: CCACACGTCTACGCTTTGGA

oECA858: AATCGTGGCATTGGTGGACA

### Chromosome IVR NILs:

**ECA240[*eanIR160*(IV:12,865,211-17,493,829, CB4856>N2)]**

starting RIAL: QX349

**ECA241[*eanIR161*(IV:13,016,066-17,493,829, N2>CB4856)]**

starting RIAL: QX375

Left indel primers (IV: 13,207,120)

oECA904: AACAGATACTCGCCGTTGCT

oECA905: ATTTGTACCACGCGTGACCT

Right indel primers (IV: 17,356,993)

oECA910: GACAACGCCCACTACGACAA

oECA911: ACCCAACCAGTTGAGCACAT

### Chromosome V NILs:

**ECA230[*eanIR150*(V:7,082,839-13,839,858, N2>CB4856)]**

starting RIAL: QX131

**ECA232[*eanIR152*(V:7,667,158-13,678,801, CB4856>N2)]**

starting RIAL: QX450

Left indel primers (V: 7,862,556)

oECA799: TTCTCGCTACTGGAACACGC

oECA800: TCAAGAAGCGTTGGGAAGTCT

Right indel primers (V: 13,110,045)

oECA745: TGCAGAGGTGGAGTAACCCT

oECA746: CTCGGTCTCTCCCCCACTAA

Chromosome V CSSs:

**ECA554[*eanIR321*(V:1-20,924,180, N2>CB4856)]**

**ECA573[*eanIR322*(V:1-20,923,490, CB4856>N2)]**

Left indel primers (V: 144,547)

oECA1141: CTCATGGGAGTAACCTGGGC

oECA1142: CGGTGACAACGGAGAATCCA

Right indel primers (V: 20,622,851)

oECA1147: GTTTAGTACCAGCGGGGCAT

oECA1148: TGCATTCCGACCCAAGAGAC

Background genotype confirmation primers for Chromosome V CSSs:

(I: 7,802,675)

oECA835: GTGGGTGGGAAGAAGCCTTT

oECA836: GCGTTGTGCAACCCAAAATG

(I: 14,736,165)

oECA631: GCTCAGCTCTTCACTTCCCA

oECA638: GTGCAATTGCGCAGGTAAGG

(II: 6,765,211)

oECA609: TTTCACACAAACCATGCGCT

oECA610: ACTCGTCTGCTGGGTATTCT

(II: 12,106,984)

oECA644: GGTCTGTCCAGTGTCCAGAA

oECA651: TCTGACAAGCGGCTTTCAGT

(III: 9,593,415)

oECA656: TGGCTGGGCATGGCTTAAA

oECA662: CGGGGTACTACACTATGGGG

(III: 6,040,736)

oECA655: GTTTGCATACACCAATGGCGA

oECA661: TGGAAGACGTGCTGAGATGG

(IV: 8,501,135)

oECA859: CTCGCTAATGGGTGAGCGAT

oECA860: TCCTGGAATCAACAACAGCA

(IV: 1,039,851)

oECA1132: ACAGGCGTTCAAAGACACCA

oECA1133: TGTCGAACAAGTGCCACAGT

(IV: 17,317,014)

oECA1135: TTTCAGACAGGAAAGCGCCT

oECA1136: GTTGAGAGATCCGGACCGAC

(V: 144,547)

oECA1141: CTCATGGGAGTAACCTGGGC

oECA1142: CGGTGACAACGGAGAATCCA

(V: 11,940,588)

oECA741: CCAGAATTTAGCATGCGTGGG

oECA742: AGTGTCTGGTTCCGTTAGTACT

(V: 20,622,851)

oECA1147: GTTTAGTACCAGCGGGGCAT

oECA1148: TGCATTCCGACCCAAGAGAC

**File S1 -- dosedata.csv**

| Column     | Description                                                                                                                                                               |
|------------|---------------------------------------------------------------------------------------------------------------------------------------------------------------------------|
| date       | Date on which the plates were scored in YYYYMMDD format                                                                                                                   |
| experiment | If applicable, title of experiment, used to aggregate all blocks of a multiple-day assay                                                                                  |
| round      | If applicable, numerical value indicating a block of a multiple-day assay, used to aggregate plates that tested the same toxin across multiple days                       |
| assay      | If applicable, letter indicating a block of a multiple-day assay                                                                                                          |
| condition  | Toxin or control to which animals in a given well were exposed and the dose of that toxin in $\mu\text{M}$                                                                |
| control    | If animals in a given well were exposed to a toxin, either DMSO or water indicating the diluent. If animals in a given well were exposed to a control, then NA is output. |
| plate      | Number indicating the 96-well plate                                                                                                                                       |
| row        | Letter (A-H) indicating the row of the 96-well plate from which the phenotype data were collected                                                                         |
| col        | Number indicating the column of the 96-well plate from which the phenotype data were collected                                                                            |
| strain     | Name of the strain placed into a given well of the 96-well plate                                                                                                          |
| trait      | Population parameter measured by the BIOSORT                                                                                                                              |
| phenotype  | Numerical value of the population parameter measured for a given well                                                                                                     |

**File S2 -- allRIALregressed.csv**

| Column     | Description                                                                                                                                         |
|------------|-----------------------------------------------------------------------------------------------------------------------------------------------------|
| date       | Date on which the plates were scored in YYYYMMDD format                                                                                             |
| experiment | If applicable, title of experiment, used to aggregate all blocks of a multiple-day assay                                                            |
| round      | If applicable, numerical value indicating a block of a multiple-day assay, used to aggregate plates that tested the same toxin across multiple days |



|           |                                                                                                                                                                           |
|-----------|---------------------------------------------------------------------------------------------------------------------------------------------------------------------------|
| assay     | If applicable, letter indicating a block of a multiple-day assay                                                                                                          |
| condition | Toxin or control to which animals in a given well were exposed                                                                                                            |
| control   | If animals in a given well were exposed to a toxin, either DMSO or water indicating the diluent. If animals in a given well were exposed to a control, then NA is output. |
| plate     | Number indicating the 96-well plate                                                                                                                                       |
| row       | Letter (A-H) indicating the row of the 96-well plate from which the phenotype data were collected                                                                         |
| col       | Number indicating the column of the 96-well plate from which the phenotype data were collected                                                                            |
| strain    | Name of the strain placed into a given well of the 96-well plate                                                                                                          |
| trait     | Population parameter measured by the BIOSORT                                                                                                                              |
| phenotype | Numerical value of the population parameter measured for a given well                                                                                                     |

**File S3 -- allAnnotatedLods.csv**

| Column    | Description                                                                                                                                                                                                                       |
|-----------|-----------------------------------------------------------------------------------------------------------------------------------------------------------------------------------------------------------------------------------|
| marker    | Genotypic marker name                                                                                                                                                                                                             |
| chr       | Chromosome on which the marker is located                                                                                                                                                                                         |
| pos       | Genomic position at which the marker is located, in bp (WS245)                                                                                                                                                                    |
| trait     | Toxin response measured by the BIOSORT in toxin.trait format                                                                                                                                                                      |
| lod       | LOD score indicating the strength of correlation between genotype at the marker and phenotype of RIALs                                                                                                                            |
| threshold | GWER-derived LOD score above which a LOD score is considered significant                                                                                                                                                          |
| iteration | Numerical value indicating the number of fsearch() iterations at which the given LOD score was identified, where each iteration takes the highest LOD score of the previous iteration as a cofactor before performing the mapping |
| var_exp   | For the highest significant LOD score per iteration, the amount of RIAL phenotypic variation that can be explained by genotype at the peak marker                                                                                 |

|             |                                                                                                                            |
|-------------|----------------------------------------------------------------------------------------------------------------------------|
| eff_size    | Coefficient of a linear model between genotype and phenotype indicating the effect size of a QTL                           |
| ci_l_marker | Genotypic marker indicating the left boundary of a 95% confidence interval around a QTL peak marker                        |
| ci_l_pos    | Position, in bp, across the chromosome indicating the left boundary of a 95% confidence interval around a QTL peak marker  |
| ci_r_marker | Genotypic marker indicating the right boundary of a 95% confidence interval around a QTL peak marker                       |
| ci_r_pos    | Position, in bp, across the chromosome indicating the right boundary of a 95% confidence interval around a QTL peak marker |

#### File S4 -- allRIAILsPC

| Column    | Description                                                             |
|-----------|-------------------------------------------------------------------------|
| strain    | Name of a RIAIL                                                         |
| condition | Name of the toxin tested in the HTA                                     |
| trait     | Name of the principal component for a given toxin                       |
| phenotype | Numerical value indicating the phenotypic measurement for a given trait |

#### File S5 -- allAnnotatedLodsPC.csv

| Column    | Description                                                                                             |
|-----------|---------------------------------------------------------------------------------------------------------|
| marker    | Genotypic marker name                                                                                   |
| chr       | Chromosome on which the marker is located                                                               |
| pos       | Genomic position at which the marker is located, in bp (WS245)                                          |
| trait     | Name of the principal component in toxin.PCX format                                                     |
| lod       | LOD score indicating the strength of correlation between genotype at the marker and phenotype of RIAILs |
| threshold | GWER-derived LOD score above which a LOD score is considered significant                                |

|             |                                                                                                                                                                                                                                   |
|-------------|-----------------------------------------------------------------------------------------------------------------------------------------------------------------------------------------------------------------------------------|
| iteration   | Numerical value indicating the number of fsearch() iterations at which the given LOD score was identified, where each iteration takes the highest LOD score of the previous iteration as a cofactor before performing the mapping |
| var_exp     | For the highest significant LOD score per iteration, the amount of RIAIL phenotypic variation that can be explained by genotype at the peak marker                                                                                |
| eff_size    | Coefficient of a linear model between genotype and phenotype indicating the effect size of a QTL                                                                                                                                  |
| ci_l_marker | Genotypic marker indicating the left boundary of a 95% confidence interval around a QTL peak marker                                                                                                                               |
| ci_l_pos    | Position, in bp, across the chromosome indicating the left boundary of a 95% confidence interval around a QTL peak marker                                                                                                         |
| ci_r_marker | Genotypic marker indicating the right boundary of a 95% confidence interval around a QTL peak marker                                                                                                                              |
| ci_r_pos    | Position, in bp, across the chromosome indicating the right boundary of a 95% confidence interval around a QTL peak marker                                                                                                        |

**File S6 -- scantwosummary.csv**

| Column   | Description                                                                                                                              |
|----------|------------------------------------------------------------------------------------------------------------------------------------------|
| trait    | Principal component, in toxin.PCX format                                                                                                 |
| chr1     | First chromosome on which interaction/additive loci are being detected                                                                   |
| chr2     | Second chromosome on which interaction/additive loci are being detected                                                                  |
| pos1f    | Position, in cM, of the maximum full LOD (two QTL plus interaction) on chr1                                                              |
| pos2f    | Position, in cM, of the maximum full LOD (two QTL plus interaction) on chr2                                                              |
| lod.full | Maximum LOD score for the full model (improvement of the fit of a full two-locus model over the null model)                              |
| lod.fv1  | Maximum LOD score for evidence of a second QTL, allowing for epistasis (improvement of the full two-QTL model over the single-QTL model) |
| lod.int  | Maximum LOD score for evidence of an interaction (improvement of the full two-QTL model over the additive two-QTL model)                 |
| pos1a    | Position, in cM, of the maximum additive LOD on chr1                                                                                     |

|             |                                                                                                                              |
|-------------|------------------------------------------------------------------------------------------------------------------------------|
| pos2a       | Position, in cM, of the maximum additive LOD on chr2                                                                         |
| lod.add     | Maximum LOD score for the additive model (improvement of the fit of an additive two-locus model over the null model)         |
| lod.av1     | Maximum LOD score for evidence of a second, additive QTL (improvement of the two-QTL additive model over a single-QTL model) |
| fv1_thresh  | Threshold of significance for a second QTL, allowing for epistasis                                                           |
| full_thresh | Threshold of significance for the full two-QTL model                                                                         |
| add_thresh  | Threshold of significance for a two-QTL additive model                                                                       |
| av1_thresh  | Threshold of significance for a second, additive QTL                                                                         |
| int_thresh  | Threshold of significance for an interactive second QTL                                                                      |

**File S7 -- varianceComponents.csv**

| Column            | Description                                                          |
|-------------------|----------------------------------------------------------------------|
| condition         | Toxin measured in the HTA                                            |
| trait             | Principal component measured                                         |
| broadense_h2      | Total heritability estimate, including additive and interactive loci |
| narrowsense_h2    | Additive component of the heritability estimate                      |
| narrowsense_h2_SE | Standard error around the narrowsense_h2 estimate                    |
| interaction_VE    | Interactive component of the heritability estimate                   |
| interaction_SE    | Standard error around the interaction_VE estimate                    |

**File S8 -- WGS.vcf.gz**

| Column | Description                                                    |
|--------|----------------------------------------------------------------|
| CHROM  | Chromosome where the variant is located                        |
| POS    | Genomic position at which the marker is located, in bp (WS245) |
| ID     | Unique identifiers, if applicable                              |

|          |                                                                     |
|----------|---------------------------------------------------------------------|
| REF      | Allele of the reference strain (N2)                                 |
| ALT      | Allele of CB4856                                                    |
| QUAL     | Quality score                                                       |
| FILTER   | Describes filters that have been applied to the data, if applicable |
| INFO     | Meta information lines                                              |
| FORMAT   | Format of WGS information including genotype call and allele depth  |
| <strain> | WGS information for each strain                                     |

**File S9 -- PC\_trait\_correlation.csv**

| Column         | Description                                                                                                            |
|----------------|------------------------------------------------------------------------------------------------------------------------|
| PC_trait       | Principal component, in toxin.PCX format                                                                               |
| trait          | Population parameter measured by the BIOSORT                                                                           |
| correlation    | Spearman correlation value between the RIAIL phenotypes for the PC_trait and trait                                     |
| cluster_traits | <i>TRUE</i> if the trait resides in the same dendrogram cluster as the trait chosen to represent a principal component |
| HS_IVL         | <i>TRUE</i> if the principal component maps to the IVL hotspot                                                         |
| HS_IVR         | <i>TRUE</i> if the principal component maps to the IVR hotspot                                                         |
| HS_V           | <i>TRUE</i> if the principal component maps to the V hotspot                                                           |
| NIL_test       | <i>TRUE</i> if the QTL was tested for recapitulation with NILs and CSSs                                                |

**File S10 -- allNILCSSregressed.csv**

| Column     | Description                                                                              |
|------------|------------------------------------------------------------------------------------------|
| date       | Date on which the plates were scored in YYYYMMDD format                                  |
| experiment | If applicable, title of experiment, used to aggregate all blocks of a multiple-day assay |

|           |                                                                                                                                                           |
|-----------|-----------------------------------------------------------------------------------------------------------------------------------------------------------|
| round     | If applicable, numerical value indicating a block of a multiple-day assay, used to aggregate plates that tested the same toxin across multiple days       |
| assay     | If applicable, letter indicating a block of a multiple-day assay                                                                                          |
| condition | Toxin or control to which animals in a given well were exposed                                                                                            |
| control   | If animals in a given well were exposed to a toxin, either DMSO or water indicating the diluent. If animals in a given well were exposed to a control, NA |
| plate     | Number indicating the 96-well plate                                                                                                                       |
| row       | Letter (A-H) indicating the row of the 96-well plate from which the phenotype data were collected                                                         |
| col       | Number indicating the column of the 96-well plate from which the phenotype data were collected                                                            |
| strain    | Name of the strain placed into a given well of the 96-well plate                                                                                          |
| trait     | Population parameter measured by the BIOSORT                                                                                                              |
| phenotype | Numerical value of the population parameter measured for a given well                                                                                     |
| drugtrait | Representation of condition and trait, separated by “.”                                                                                                   |

**File S11 -- css\_nil\_stats.csv**

| Column       | Description                                                                                                                                  |
|--------------|----------------------------------------------------------------------------------------------------------------------------------------------|
| condition    | Toxin or control to which animals in a given well were exposed and the dose of that toxin in $\mu\text{M}$                                   |
| trait        | Population parameter measured by the BIOSORT                                                                                                 |
| par_sig      | Statistical significance between the parents, N2 and CB4856                                                                                  |
| N2_res       | <i>TRUE</i> if N2 is more resistant than CB4856 (calculated by comparing strain medians)                                                     |
| N2nil_sig_CB | Statistical significance between N2 > CB4856 NIL and CB4856 parent                                                                           |
| N2nil_recap  | <i>TRUE</i> if N2 > CB4856 NIL recapitulates the expected phenotype of N2 (e.g. is more resistant than CB4856 if N2 is the resistant parent) |

|              |                                                                                                                                                                                                       |
|--------------|-------------------------------------------------------------------------------------------------------------------------------------------------------------------------------------------------------|
|              | strain)                                                                                                                                                                                               |
| N2nil_sig_N2 | Statistical significance between N2 > CB4856 NIL and N2 parent                                                                                                                                        |
| CBnil_sig_N2 | Statistical significance between CB4856 > N2 NIL and N2 parent                                                                                                                                        |
| CBnil_recap  | <i>TRUE</i> if CB4856 > N2 NIL recapitulates the expected phenotype of CB4856 (e.g. is more resistant than N2 if CB4856 is the resistant parent strain)                                               |
| CBnil_sig_CB | Statistical significance between CB4856 > N2 NIL and CB4856 parent                                                                                                                                    |
| nils_sig     | Statistical significance between the NIL strains                                                                                                                                                      |
| N2nil_res    | <i>TRUE</i> if N2 > CB4856 NIL is more resistant than CB4856 > N2 NIL                                                                                                                                 |
| exp          | Name of the assay: IVL - hotspot on the center of chromosome IV; IVR - hotspot on right of chromosome IV; V - hotspot on center of chromosome V (NIL); CSSV - hotspot on center of chromosome V (CSS) |
| chr          | Chromosome of assay (IV or V)                                                                                                                                                                         |
| N2nil        | Name of the N2 > CB4856 NIL for this assay                                                                                                                                                            |
| CBnil        | Name of the CB4856 > N2 NIL for this assay                                                                                                                                                            |
| N2nil_value  | Median phenotype for N2 parent strain                                                                                                                                                                 |
| CBnil_value  | Median phenotype for CB4856 parent strain                                                                                                                                                             |
| N2           | Median phenotype for N2 > CB4856 NIL strain                                                                                                                                                           |
| CB           | Median phenotype for CB4856 > N2 NIL strain                                                                                                                                                           |

**File S12 -- assays\_category.csv**

| Column    | Description                                                                                                                                                                                     |
|-----------|-------------------------------------------------------------------------------------------------------------------------------------------------------------------------------------------------|
| condition | Toxin or control to which animals in a given well were exposed and the dose of that toxin in $\mu\text{M}$                                                                                      |
| trait     | Population parameter measured by the BIOSORT                                                                                                                                                    |
| exp       | Name of the assay: IVL - hotspot on the center of chromosome IV; IVR - hotspot on right of chromosome IV; V - hotspot on center of chromosome V (NIL); CSSV - hotspot on center of chromosome V |

|                    |                                                                                                                                                                                                                                                                                                                               |
|--------------------|-------------------------------------------------------------------------------------------------------------------------------------------------------------------------------------------------------------------------------------------------------------------------------------------------------------------------------|
|                    | (CSS)                                                                                                                                                                                                                                                                                                                         |
| primary_category   | Category defined by just the NIL or the CSS assay. Options include recapitulation, no_qtl_effect, unidirectional_transgressive, bidirectional_transgressive, parents_not_significant, or miscellaneous.                                                                                                                       |
| secondary_category | Category defined by combining the NIL and CSS assay, if applicable (only traits that mapped to chromosome V). Options include recapitulation, intrachromosomal_unidirectional_transgressive, interchromosomal_external_bidirectional_transgressive, interchromosomal_internal_unidirectional_transgressive, or miscellaneous. |
